# Supplementary material for: MiR-203a-3p regulates TGF-β1-induced epithelial–mesenchymal transition (EMT) in asthma by regulating Smad3 pathway through SIX1
Source: Oxford University Press journal article supplement (doi:10.1042/bsr20192645), 2020-02-01
Supplement: bsr-2019-2645_supp.pdf [file bsr-2019-2645_supp.pdf]

**A**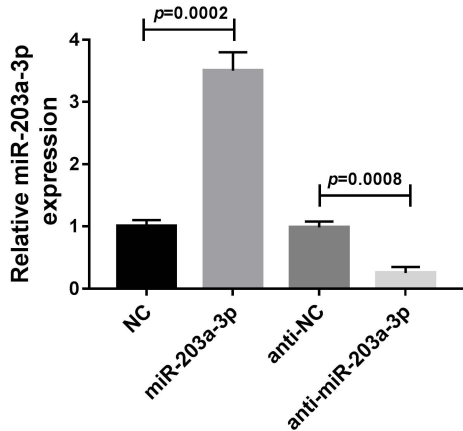**B**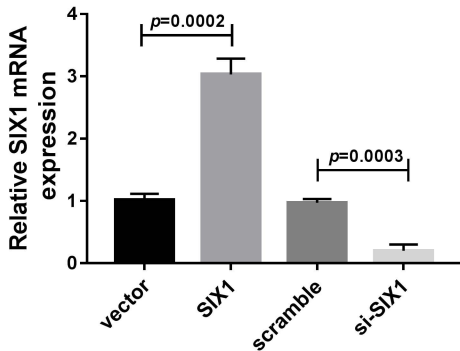

Figure S1. The transfection efficiency of miR-203a-3p and SIX1. (A) The level of miR-203a-3p was detected using qRT-PCR in 16HBE cells transfected with NC, miR-203a-3p, anti-NC, or anti-miR-203a-3p. (B) The expression of SIX1 was detected using qRT-PCR in 16HBE cells transfected with vector, SIX1, scramble, or si-SIX1.
